# Supplementary material
Source: Royal Society of Chemistry journal article supplement (doi:10.1039/d6nj01099g)
Supplement: d6nj01099g1.pdf [file d6nj01099g1.pdf]

## Supporting Information

**Facile transformation of rofecoxib into a novel near-infrared  
AIEgen for real-time dynamic monitoring of lipid droplets  
metabolism**

## **Instruments.**

High-resolution mass spectra (HRMS) were obtained at the Mass Spectrometry Service Center of Fujian institute of microbiology on an Agilent 6545 Q-TOF LCMS. Nuclear magnetic resonance (NMR) spectra were obtained on a Bruker UNI-500 and AVII-500B instrument and JEOL 600MHz spectrometers (Framingham, MA, USA) using deuterated solvent (DMSO-*d*6). Photoluminescence (PL) excitation and emission spectra and PL decays were recorded on the FLS980 spectrometer (Edinburgh) equipped with both continuous Xenon (450 W). PL, AIE were taken by using a Canon 70D digital camera without using any filter. All the spectral data were recorded at room temperature unless otherwise noted, and corrected for the spectral response of both the spectrometer and the integrating sphere.

## **Materials and methods**

### **General Information.**

Unless otherwise stated, all chemicals and reagents were obtained commercially (Aladdin-Reagent and Damas-Beta) and used without further purification. All of the solvents were purified and dried before use by conventional methods.

### **Cell lines**

Cell lines (human cervical adenocarcinoma cell line **Hela**, mouse embryonic fibroblast cell lines **3T3-L1**) were purchased from Shanghai Institute of Cell Biology, Chinese Academy of Sciences. 3T3-L1 cells were maintained in NGM medium (NGM: DMEM with 1% Glutamax, 1% Non-essential Amino Acids and 1 mM sodium pyruvate) supplemented with 5% newborn calf serum. Hela cells were maintained in 1640 medium supplemented with 10% fetal bovine serum (Gibco, Invitrogen, Grand Island, NY, USA), 100 µg/mL penicillin and 100 µg/mL streptomycin (Gibco, Invitrogen, Grand Island, NY, USA) at 37°C with 5% CO<sub>2</sub>.

### **Cytotoxicity Assays**

Hela cells were seeded into 96-well microplates at  $1 \times 10^4$  cells per well. 18 h later, these adhesive cells were incubated with RFHX-1 or BODIPY 493/593 at various concentrations (0, 1, 10, 100 µM). The background control wells in the plate were filled only with culture medium. After an incubation of 24 h, cells were washed with sterile PBS before fresh medium was added. Subsequently, the cells were treated with 5 mg/mL MTT (10 µL/well) and incubated for an additional 4 h (37 °C, 5% CO<sub>2</sub>). The cells were then dissolved in dimethyl sulfoxide (150 µL/well), and the absorbance at 570 nm was recorded using a

microplate reader (Biotek, USA).

#### **Hela cells treatment with oleic acid**

HeLa cells were grown on a 35mm Petri dish overnight; the cells were incubated with oleic acid (OA) (0.1 mM) and without OA as control at different times (0-24 h) and subsequently stained with RFHX-1 or BODIPY 493/593 (10  $\mu$ M) for 20 min.

#### **Differentiation of 3T3-L1 adipocytes**

Differentiation of 3T3-L1 adipocytes was performed by changing the growth medium to NGM medium with 1  $\mu$ M insulin, supplemented with 100 nM dexamethasone and 500  $\mu$ M 3-isobutyl-1-methylxanthine for 2 days, followed with another 2-day culturing in NGM medium with 1  $\mu$ M insulin. After that, cells were returned back to NGM medium for at least 12 days before starting the detection experiments. And subsequently stained with RFHX-1 or BODIPY 493/593 (10  $\mu$ M) for 20 min.

#### **Cell imaging and Co-localization**

Cell imaging was taken using a confocal laser-scanning microscope (Olympus FluoView<sup>TM</sup> FV1000, Japan). HeLa cells in 1640 medium ( $5 \times 10^4$ /mL, 1 mL) were plated onto a confocal chamber and incubated at 37 °C for 18 h to allow cell adhesion. To the culture medium was added RFHX-1 and BODIPY 493/593 (10  $\mu$ M). After 20 min incubation, the chamber was gently washed with PBS buffer to remove unbound. An incubation chamber was applied for live-cell and Real-Time (RT) imaging, which was connected to temperature control unit 37 °C and CO<sub>2</sub> controller (1-2 hours before the experiment was allowed for stabilization of the temperature and CO<sub>2</sub> concentration).

#### **Flow cytometry**

Six medium plates of HeLa cells were grown overnight. Then the cells were incubated with 100  $\mu$ M of oleic acid for 0, 2, 3 and 4 h before collection for flow cytometry. The cells were stained with 10  $\mu$ M of RFHX-1 or BODIPY 493/593 for 15 min, respectively, and washed with PBS. The cells were analyzed by flow cytometry (Becton Dickinson FACS Aria IIIu). 10000 events were taken for each trial.

#### **Photostability**

On a confocal microscope (Leica DMI 6000 Fully Motorized Inverted Microscope), the dyes were excited with 488 nm laser light for one-photon imaging. Imaging parameters were set for each dye individually to obtain optimal images. Repeated image scans were taken. On each series of scans, six regions of interest (ROIs) with several LDs were defined. The first scan of each ROI was set to 100%. Then the pixel intensity values for each ROI were averaged and plotted against the scan number. The

resulting curve represented the bleaching rate that an experimentalist would encounter.

### Statistical analysis.

All data represent group means and standard errors of the mean (SEM). Individual group means were compared by the Newman-Keuls multiple-range test. GB-STAT software (Dynamic Microsystems, Inc., Silver Spring, MD, USA) was used for all statistical analyses

### Synthesis and characterization of RFHX-1: (5Z)-4-(4-(methylsulfonyl)phenyl)-3-phenyl-5-(2-(pyrrolidin-1-yl)benzylidene)furan-2(5H)-one

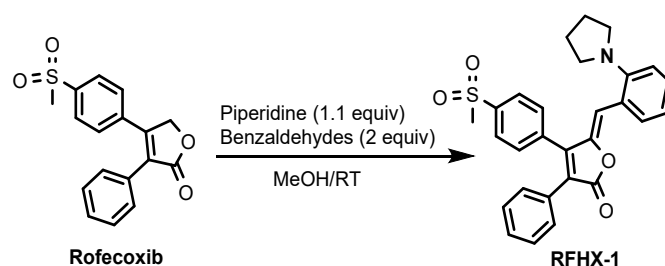

**Scheme-S1.** The synthetic route of RFHX-1

**Preparation:** Rofecoxib (0.4 g, 1.3 mmol) and 2-cyanobenzaldehyde (2.6 mmol) were dissolved in 15 mL of methanol. To this solution, piperidine (0.12 g, 1.4 mmol) was added, and the mixture was stirred at room temperature under dark conditions for 12 hours. After completion, the reaction mixture was cooled, and the precipitate was filtered off and washed with methanol. An orange solid powder, RFHX-1, was obtained in 71% yield.

$^1\text{H-NMR}$  (400 MHz,  $\text{DMSO-}d_6$ )  $\delta$  8.05 (d,  $J = 8.7$  Hz, 2H), 7.85 (d,  $J = 9.9$  Hz, 1H), 7.69 (d,  $J = 8.7$  Hz, 2H), 7.37 - 7.28 (m, 5H), 7.25 - 7.14 (m, 1H), 6.99 - 6.86 (m, 2H), 6.02 (s, 1H), 3.28 (s, 3H), 3.11 - 2.98 (m, 4H), 1.75 - 1.71 (m, 4H).  $^{13}\text{C-NMR}$  (101 MHz,  $\text{DMSO-}d_6$ )  $\delta$  168.3, 150.3, 149.5, 146.5, 142.2, 136.0, 131.6, 130.7, 130.6, 129.4, 129.4, 129.0, 128.0, 124.9, 123.0, 120.6, 116.8, 112.3, 52.6, 43.7, 24.9.

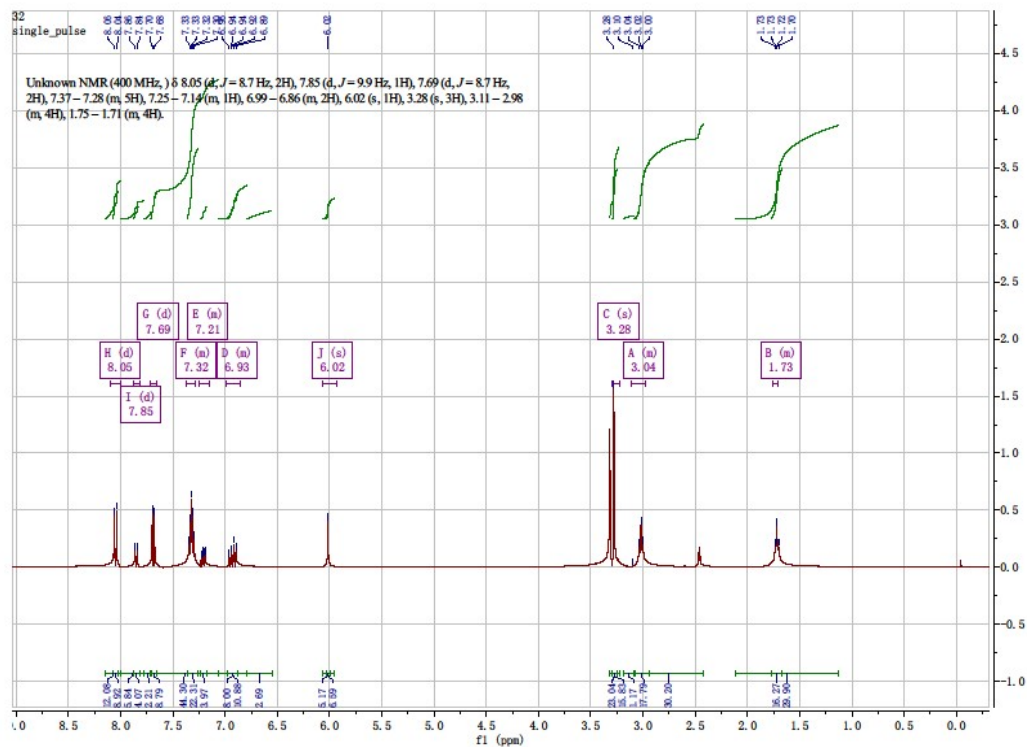

Figure S1.  $^1\text{H}$  NMR (400 MHz,  $\text{DMSO-}d_6$ ) for RFHX-1

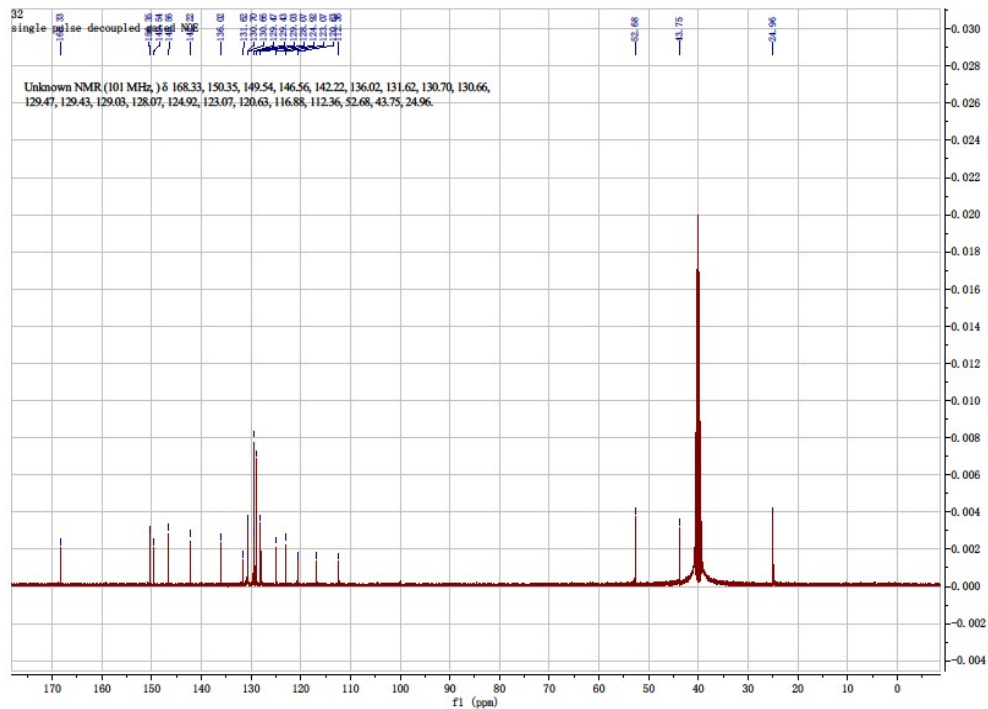

Figure S2.  $^{13}\text{C}$  NMR (101 MHz,  $\text{DMSO-}d_6$ ) for RFHX-1

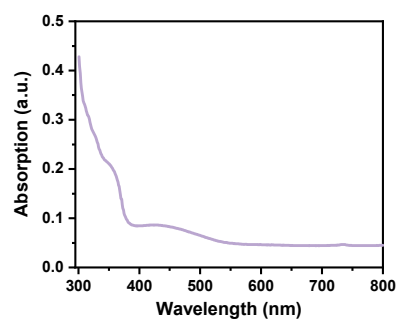

**Figure S3.** The Absorption spectrum of RFHX-1 (10 μM)

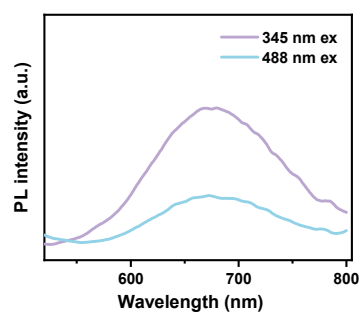

**Figure S4.** The Emission spectra of RFHX-1 (10 μM in DMSO,  $\lambda_{\text{ex}} = 345$  nm and 488 nm)

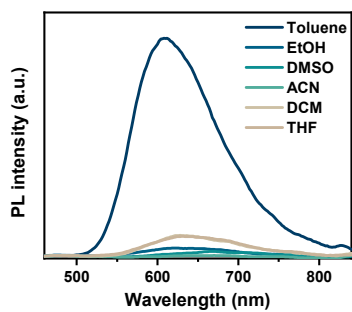

**Figure S5.** The Emission spectra of RFHX-1 (50 μM in different solvents,  $\lambda_{\text{ex}} = 365$  nm)

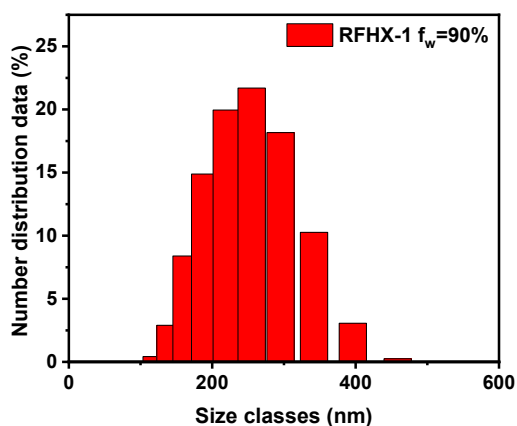

**Figure S6.** Particle size distribution of RFHX-1 in DMSO/H<sub>2</sub>O (fw = 90%)

### The two-photon absorption cross section (62PA) of RFHX-1

An open-aperture Z-scan experiment was used to investigate the sign and magnitude of the nonlinear absorption coefficient of the compounds. In femtosecond Z-scan measurements, the input wavelength outputs from the OPA were tuned to be 800 nm. The repetition rate was tuned to be 20 Hz. All Z-scan experiments were performed under a nearly Gaussian beam. A basic description of the experimental apparatus can be found in ref<sup>32</sup>. All of the compounds were dissolved in toluene at a concentration of  $10 \times 10^{-3} \text{ mol L}^{-1}$  and placed in 2 mm quartz cells.

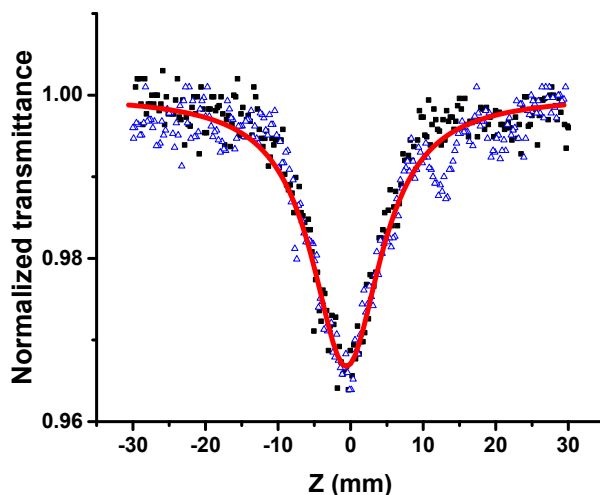

**Figure S7.** Femtosecond open-aperture Z-scan experiments at 800 nm. Dots show experimental data and the solid lines show fitted curves.

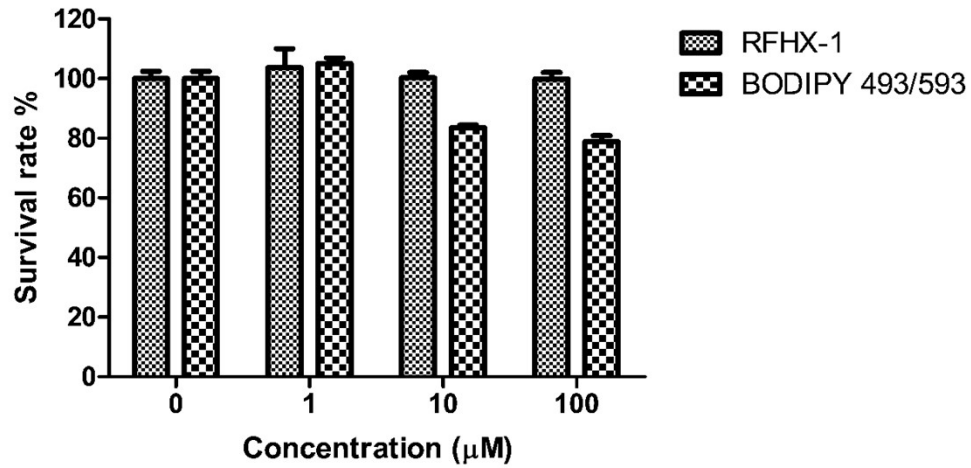

**Figure S8.** Using MTT assay to detect toxicity of RFHX-1 and BODIPY 493/593 for HeLa cells under different concentrations.

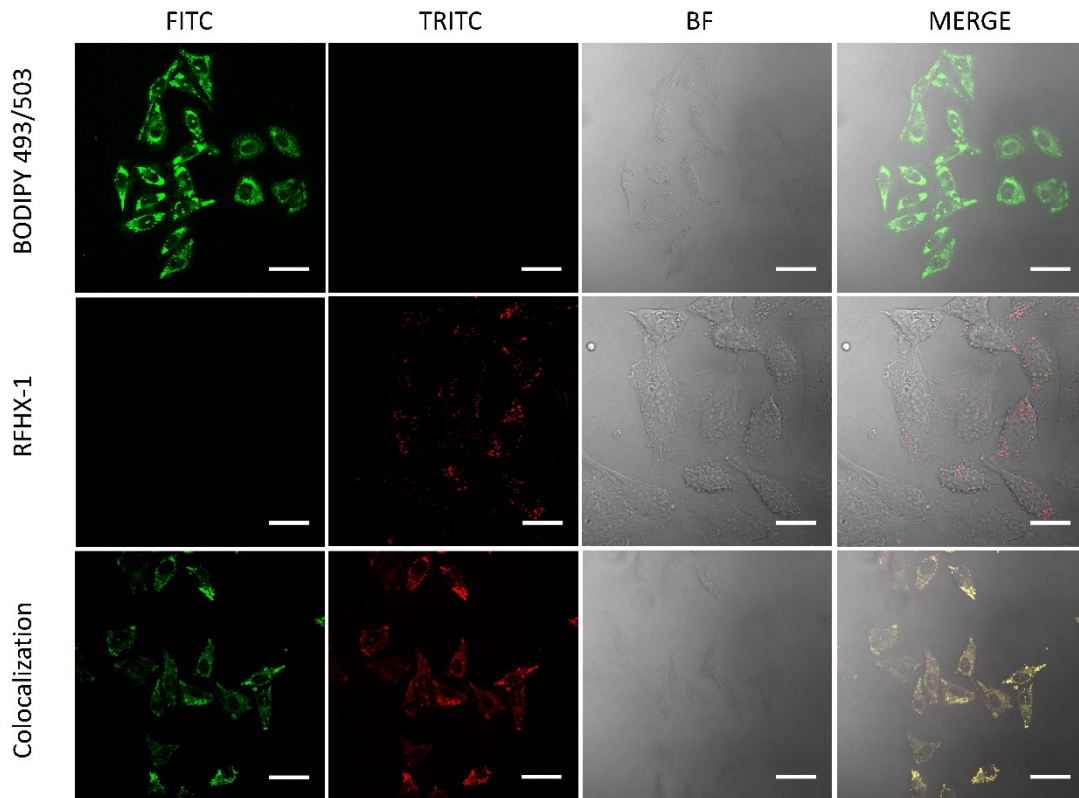

**Figure S9.** Fluorescence images of HeLa cells stained with RFHX-1 and BODIPY 493/593 (10 μM,  $\lambda_{ex}$  = 488 nm,  $\lambda_{em}$  = 570-1000 nm), scale bar: 20 μm, corresponding to a colocalization coefficient of 0.93.

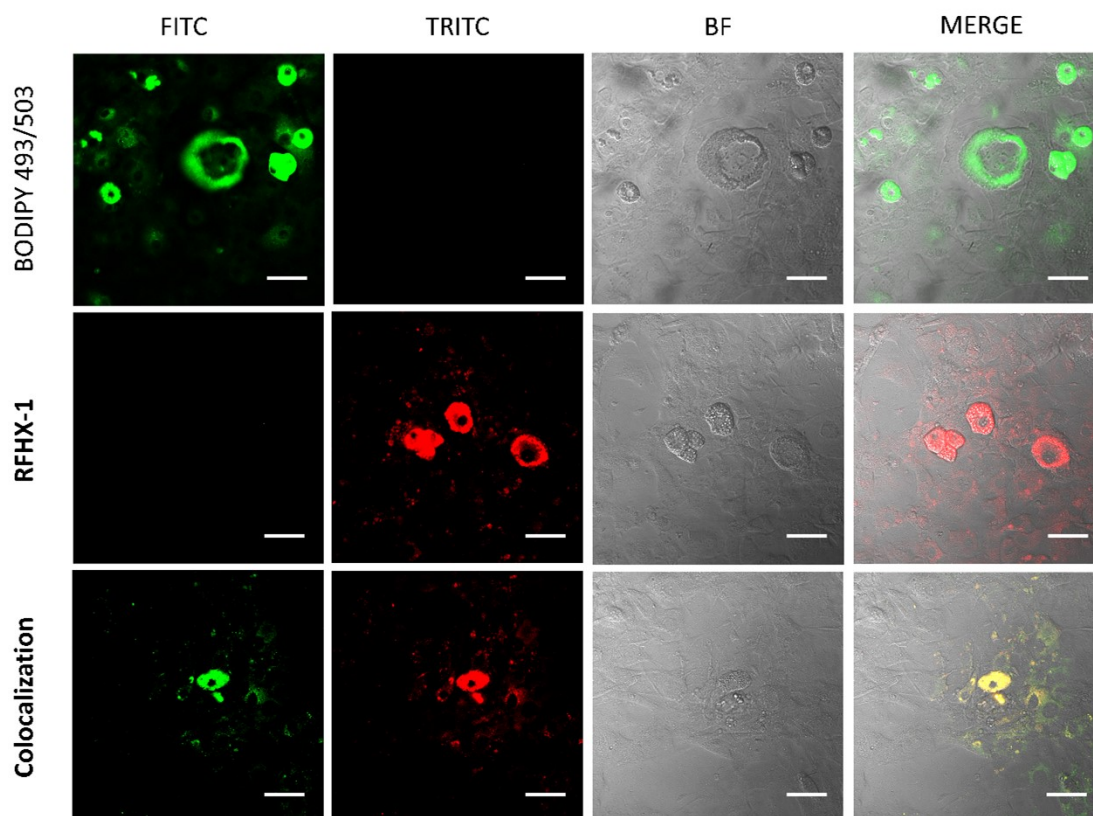

**Figure S10.** Fluorescence images of 3T3-L1 cells stained with RFHX-1 and BODIPY 493/593 (10  $\mu$ M,  $\lambda_{\text{ex}} = 488$  nm,  $\lambda_{\text{em}} = 570$ -1000 nm), scale bar: 20  $\mu$ m.

## Crystal data and the collection of parameters

### 1. Crystal data and structure refinement for RFHX-1.

|                             |                                                                                   |
|-----------------------------|-----------------------------------------------------------------------------------|
| Identification code         | RFHX-1                                                                            |
| Empirical formula           | C <sub>28</sub> H <sub>25</sub> N O <sub>4</sub> S                                |
| Formula weight              | 471.55                                                                            |
| Temperature                 | 150(2) K                                                                          |
| Wavelength                  | 1.54178 Å                                                                         |
| Crystal system, space group | Monoclinic, P2/c                                                                  |
| Unit cell dimensions        | a = 17.8670(4) Å    alpha = 90 deg.<br>b = 6.04330(10) Å    beta = 96.539(2) deg. |

$c = 21.7935(4) \text{ \AA}$   $\gamma = 90 \text{ deg.}$

|                                      |                                                                  |
|--------------------------------------|------------------------------------------------------------------|
| Volume                               | 2337.86(8) $\text{\AA}^3$                                        |
| Z, Calculated density                | 4, 1.340 $\text{Mg/m}^3$                                         |
| Absorption coefficient               | 1.521 $\text{mm}^{-1}$                                           |
| F(000)                               | 992                                                              |
| Crystal size                         | 0.100 x 0.060 x 0.050 mm                                         |
| Theta range for data collection      | 4.083 to 72.290 deg.                                             |
| Limiting indices                     | $-22 \leq h \leq 22$ , $-7 \leq k \leq 5$ , $-26 \leq l \leq 25$ |
| Reflections collected / unique       | 10416 / 4503 [R(int) = 0.0306]                                   |
| Completeness to theta = 67.679       | 99.7 %                                                           |
| Absorption correction                | Semi-empirical from equivalents                                  |
| Max. and min. transmission           | 1.00000 and 0.59483                                              |
| Refinement method                    | Full-matrix least-squares on $F^2$                               |
| Data / restraints / parameters       | 4503 / 0 / 307                                                   |
| Goodness-of-fit on $F^2$             | 1.020                                                            |
| Final R indices [ $I > 2\sigma(I)$ ] | R1 = 0.0489, wR2 = 0.1267                                        |
| R indices (all data)                 | R1 = 0.0611, wR2 = 0.1398                                        |
| Extinction coefficient               | n/a                                                              |
| Largest diff. peak and hole          | 0.831 and -0.462 $\text{e.\AA}^{-3}$                             |

## 2. Atomic coordinates ( $\times 10^4$ ) and equivalent isotropic

displacement parameters ( $\text{Å}^2 \times 10^3$ ) for RFHX-1.

U(eq) is defined as one third of the trace of the orthogonalized Uij tensor.

|       | x       | y        | z       | U(eq) |
|-------|---------|----------|---------|-------|
| S(1)  | 4249(1) | 4893(1)  | 3562(1) | 31(1) |
| O(1)  | 1493(1) | 3242(2)  | 367(1)  | 24(1) |
| O(2)  | 1618(1) | 5601(3)  | -414(1) | 32(1) |
| O(3)  | 4982(1) | 3951(4)  | 3559(1) | 49(1) |
| O(4)  | 4180(1) | 7108(3)  | 3790(1) | 46(1) |
| N(1)  | 1350(1) | -1133(3) | 2391(1) | 24(1) |
| C(1)  | 1833(1) | 5016(3)  | 104(1)  | 24(1) |
| C(2)  | 2457(1) | 5811(3)  | 551(1)  | 21(1) |
| C(3)  | 2469(1) | 4481(3)  | 1056(1) | 21(1) |
| C(4)  | 1868(1) | 2883(3)  | 951(1)  | 22(1) |
| C(5)  | 1673(1) | 1336(3)  | 1347(1) | 22(1) |
| C(6)  | 1105(1) | -375(3)  | 1282(1) | 22(1) |
| C(7)  | 700(1)  | -905(4)  | 708(1)  | 28(1) |
| C(8)  | 239(1)  | -2741(4) | 636(1)  | 30(1) |
| C(9)  | 184(1)  | -4127(4) | 1133(1) | 31(1) |
| C(10) | 558(1)  | -3628(3) | 1709(1) | 27(1) |
| C(11) | 998(1)  | -1706(3) | 1803(1) | 23(1) |
| C(12) | 1197(2) | 1058(4)  | 2652(1) | 43(1) |
| C(13) | 1185(2) | 732(5)   | 3330(1) | 52(1) |
| C(14) | 1642(2) | -1384(4) | 3467(1) | 42(1) |
| C(15) | 1395(1) | -2759(4) | 2896(1) | 31(1) |
| C(16) | 2956(1) | 4606(3)  | 1651(1) | 20(1) |
| C(17) | 3413(1) | 2832(3)  | 1866(1) | 24(1) |
| C(18) | 3827(1) | 2929(4)  | 2444(1) | 26(1) |
| C(19) | 3776(1) | 4805(3)  | 2805(1) | 23(1) |
| C(20) | 3336(1) | 6596(3)  | 2591(1) | 27(1) |
| C(21) | 2934(1) | 6499(3)  | 2010(1) | 26(1) |
| C(22) | 3713(2) | 3119(5)  | 3982(1) | 51(1) |
| C(23) | 2959(1) | 7635(3)  | 424(1)  | 22(1) |
| C(24) | 3710(1) | 7665(4)  | 687(1)  | 25(1) |
| C(25) | 4180(1) | 9407(4)  | 573(1)  | 28(1) |
| C(26) | 3910(1) | 11139(4) | 190(1)  | 30(1) |
| C(27) | 3170(1) | 11102(4) | -82(1)  | 28(1) |
| C(28) | 2694(1) | 9377(3)  | 34(1)   | 25(1) |



### 3. Anisotropic displacement parameters ( $\text{\AA}^2 \times 10^3$ ) for RFHX-1.

---

|       | U11   | U22   | U33   | U23    | U13    | U12    |
|-------|-------|-------|-------|--------|--------|--------|
| S(1)  | 30(1) | 45(1) | 17(1) | -2(1)  | -3(1)  | -4(1)  |
| O(1)  | 27(1) | 25(1) | 19(1) | 2(1)   | -4(1)  | -3(1)  |
| O(2)  | 40(1) | 35(1) | 20(1) | 5(1)   | -7(1)  | -4(1)  |
| O(3)  | 31(1) | 80(1) | 32(1) | -6(1)  | -10(1) | 3(1)   |
| O(4)  | 57(1) | 50(1) | 28(1) | -14(1) | -5(1)  | -6(1)  |
| N(1)  | 31(1) | 19(1) | 23(1) | 1(1)   | 1(1)   | -1(1)  |
| C(1)  | 26(1) | 23(1) | 22(1) | 2(1)   | 1(1)   | 0(1)   |
| C(2)  | 22(1) | 20(1) | 19(1) | -1(1)  | 2(1)   | 2(1)   |
| C(3)  | 21(1) | 22(1) | 20(1) | 0(1)   | 2(1)   | 1(1)   |
| C(4)  | 23(1) | 22(1) | 18(1) | 0(1)   | -2(1)  | 0(1)   |
| C(5)  | 22(1) | 24(1) | 20(1) | -1(1)  | -1(1)  | 0(1)   |
| C(6)  | 22(1) | 21(1) | 24(1) | 0(1)   | 2(1)   | 1(1)   |
| C(7)  | 29(1) | 26(1) | 28(1) | 1(1)   | -1(1)  | -1(1)  |
| C(8)  | 29(1) | 29(1) | 31(1) | -6(1)  | -4(1)  | -2(1)  |
| C(9)  | 28(1) | 23(1) | 40(1) | -5(1)  | 0(1)   | -4(1)  |
| C(10) | 28(1) | 22(1) | 31(1) | 1(1)   | 3(1)   | -2(1)  |
| C(11) | 22(1) | 21(1) | 25(1) | 1(1)   | 1(1)   | 0(1)   |
| C(12) | 76(2) | 27(1) | 27(1) | -3(1)  | 3(1)   | 6(1)   |
| C(13) | 75(2) | 48(2) | 32(1) | -6(1)  | 4(1)   | 1(2)   |
| C(14) | 55(2) | 44(1) | 25(1) | 5(1)   | -2(1)  | -4(1)  |
| C(15) | 34(1) | 28(1) | 30(1) | 7(1)   | 1(1)   | -2(1)  |
| C(16) | 21(1) | 22(1) | 17(1) | 1(1)   | 1(1)   | -1(1)  |
| C(17) | 28(1) | 22(1) | 21(1) | -3(1)  | 0(1)   | 1(1)   |
| C(18) | 27(1) | 26(1) | 22(1) | 4(1)   | -2(1)  | 2(1)   |
| C(19) | 22(1) | 30(1) | 17(1) | 0(1)   | 0(1)   | -4(1)  |
| C(20) | 31(1) | 24(1) | 25(1) | -6(1)  | 2(1)   | 1(1)   |
| C(21) | 29(1) | 24(1) | 25(1) | 0(1)   | 1(1)   | 3(1)   |
| C(22) | 60(2) | 69(2) | 23(1) | 10(1)  | 2(1)   | -15(2) |
| C(23) | 26(1) | 22(1) | 16(1) | -1(1)  | 3(1)   | 0(1)   |
| C(24) | 29(1) | 27(1) | 18(1) | 3(1)   | 2(1)   | 1(1)   |
| C(25) | 27(1) | 33(1) | 25(1) | 1(1)   | 2(1)   | -4(1)  |
| C(26) | 35(1) | 27(1) | 28(1) | -1(1)  | 6(1)   | -6(1)  |
| C(27) | 36(1) | 23(1) | 24(1) | 4(1)   | 5(1)   | 2(1)   |
| C(28) | 27(1) | 25(1) | 22(1) | 1(1)   | 2(1)   | 2(1)   |

---

**Table 4. Hydrogen coordinates ( x 10<sup>4</sup>) and isotropic displacement parameters (A<sup>2</sup> x 10<sup>3</sup>) for RFHX-1.**

---

|        | x    | y     | z    | U(eq) |
|--------|------|-------|------|-------|
| H(5A)  | 1961 | 1375  | 1741 | 27    |
| H(7A)  | 745  | 23    | 363  | 33    |
| H(8A)  | -38  | -3051 | 247  | 36    |
| H(9A)  | -112 | -5433 | 1080 | 37    |
| H(10A) | 515  | -4602 | 2046 | 33    |
| H(12A) | 706  | 1636  | 2461 | 52    |
| H(12B) | 1596 | 2124  | 2573 | 52    |
| H(13A) | 663  | 548   | 3433 | 62    |
| H(13B) | 1421 | 1999  | 3567 | 62    |
| H(14A) | 2190 | -1084 | 3508 | 50    |
| H(14B) | 1512 | -2117 | 3847 | 50    |
| H(15A) | 1768 | -3928 | 2837 | 37    |
| H(15B) | 899  | -3457 | 2925 | 37    |
| H(17A) | 3440 | 1553  | 1617 | 29    |
| H(18A) | 4142 | 1731  | 2590 | 31    |
| H(20A) | 3312 | 7877  | 2840 | 32    |
| H(21A) | 2641 | 7733  | 1856 | 31    |
| H(22A) | 3207 | 3738  | 3990 | 76    |
| H(22B) | 3675 | 1660  | 3785 | 76    |
| H(22C) | 3958 | 2974  | 4406 | 76    |
| H(24A) | 3900 | 6480  | 945  | 30    |
| H(25A) | 4688 | 9418  | 757  | 34    |
| H(26A) | 4231 | 12340 | 115  | 36    |
| H(27A) | 2988 | 12270 | -350 | 33    |
| H(28A) | 2186 | 9376  | -152 | 30    |

---

**Table 5. Torsion angles [deg] for RFHX-1.**

---

|                         |             |
|-------------------------|-------------|
| C(4)-O(1)-C(1)-O(2)     | 177.80(19)  |
| C(4)-O(1)-C(1)-C(2)     | 0.0(2)      |
| O(2)-C(1)-C(2)-C(3)     | -176.9(2)   |
| O(1)-C(1)-C(2)-C(3)     | 0.6(2)      |
| O(2)-C(1)-C(2)-C(23)    | 0.7(4)      |
| O(1)-C(1)-C(2)-C(23)    | 178.19(17)  |
| C(23)-C(2)-C(3)-C(4)    | -178.27(19) |
| C(1)-C(2)-C(3)-C(4)     | -0.9(2)     |
| C(23)-C(2)-C(3)-C(16)   | 5.8(3)      |
| C(1)-C(2)-C(3)-C(16)    | -176.77(19) |
| C(1)-O(1)-C(4)-C(5)     | 177.70(19)  |
| C(1)-O(1)-C(4)-C(3)     | -0.5(2)     |
| C(2)-C(3)-C(4)-C(5)     | -177.2(2)   |
| C(16)-C(3)-C(4)-C(5)    | -1.0(3)     |
| C(2)-C(3)-C(4)-O(1)     | 0.9(2)      |
| C(16)-C(3)-C(4)-O(1)    | 177.14(16)  |
| O(1)-C(4)-C(5)-C(6)     | 4.7(4)      |
| C(3)-C(4)-C(5)-C(6)     | -177.5(2)   |
| C(4)-C(5)-C(6)-C(7)     | 9.7(3)      |
| C(4)-C(5)-C(6)-C(11)    | -176.2(2)   |
| C(11)-C(6)-C(7)-C(8)    | -3.6(3)     |
| C(5)-C(6)-C(7)-C(8)     | 170.5(2)    |
| C(6)-C(7)-C(8)-C(9)     | -1.5(3)     |
| C(7)-C(8)-C(9)-C(10)    | 3.2(3)      |
| C(8)-C(9)-C(10)-C(11)   | 0.2(3)      |
| C(9)-C(10)-C(11)-N(1)   | 176.95(19)  |
| C(9)-C(10)-C(11)-C(6)   | -5.3(3)     |
| C(15)-N(1)-C(11)-C(10)  | 12.7(3)     |
| C(12)-N(1)-C(11)-C(10)  | -124.1(2)   |
| C(15)-N(1)-C(11)-C(6)   | -165.04(19) |
| C(12)-N(1)-C(11)-C(6)   | 58.1(3)     |
| C(7)-C(6)-C(11)-C(10)   | 6.8(3)      |
| C(5)-C(6)-C(11)-C(10)   | -167.52(18) |
| C(7)-C(6)-C(11)-N(1)    | -175.38(18) |
| C(5)-C(6)-C(11)-N(1)    | 10.3(3)     |
| C(11)-N(1)-C(12)-C(13)  | 143.8(2)    |
| C(15)-N(1)-C(12)-C(13)  | 2.4(3)      |
| N(1)-C(12)-C(13)-C(14)  | 22.6(3)     |
| C(12)-C(13)-C(14)-C(15) | -38.1(3)    |
| C(11)-N(1)-C(15)-C(14)  | -167.74(19) |

|                         |             |
|-------------------------|-------------|
| C(12)-N(1)-C(15)-C(14)  | -26.6(2)    |
| C(13)-C(14)-C(15)-N(1)  | 39.7(2)     |
| C(2)-C(3)-C(16)-C(21)   | 60.3(3)     |
| C(4)-C(3)-C(16)-C(21)   | -115.2(2)   |
| C(2)-C(3)-C(16)-C(17)   | -122.2(2)   |
| C(4)-C(3)-C(16)-C(17)   | 62.4(3)     |
| C(21)-C(16)-C(17)-C(18) | 1.8(3)      |
| C(3)-C(16)-C(17)-C(18)  | -175.77(18) |
| C(16)-C(17)-C(18)-C(19) | 0.6(3)      |
| C(17)-C(18)-C(19)-C(20) | -2.0(3)     |
| C(17)-C(18)-C(19)-S(1)  | 175.80(16)  |
| O(3)-S(1)-C(19)-C(20)   | -140.27(18) |
| O(4)-S(1)-C(19)-C(20)   | -9.9(2)     |
| C(22)-S(1)-C(19)-C(20)  | 104.7(2)    |
| O(3)-S(1)-C(19)-C(18)   | 41.9(2)     |
| O(4)-S(1)-C(19)-C(18)   | 172.34(17)  |
| C(22)-S(1)-C(19)-C(18)  | -73.1(2)    |
| C(18)-C(19)-C(20)-C(21) | 0.9(3)      |
| S(1)-C(19)-C(20)-C(21)  | -176.87(16) |
| C(19)-C(20)-C(21)-C(16) | 1.5(3)      |
| C(17)-C(16)-C(21)-C(20) | -2.8(3)     |
| C(3)-C(16)-C(21)-C(20)  | 174.76(19)  |
| C(3)-C(2)-C(23)-C(24)   | 28.5(3)     |
| C(1)-C(2)-C(23)-C(24)   | -148.5(2)   |
| C(3)-C(2)-C(23)-C(28)   | -151.7(2)   |
| C(1)-C(2)-C(23)-C(28)   | 31.3(3)     |
| C(28)-C(23)-C(24)-C(25) | 1.2(3)      |
| C(2)-C(23)-C(24)-C(25)  | -179.03(18) |
| C(23)-C(24)-C(25)-C(26) | -0.6(3)     |
| C(24)-C(25)-C(26)-C(27) | -0.6(3)     |
| C(25)-C(26)-C(27)-C(28) | 1.2(3)      |
| C(26)-C(27)-C(28)-C(23) | -0.6(3)     |
| C(24)-C(23)-C(28)-C(27) | -0.6(3)     |
| C(2)-C(23)-C(28)-C(27)  | 179.63(18)  |

---

Symmetry transformations used to generate equivalent atoms:

**Table 6. Hydrogen bonds for RFHX-1 [A and deg.].**

---

| D-H...A               | d(D-H) | d(H...A) | d(D...A) | <(DHA) |
|-----------------------|--------|----------|----------|--------|
| C(13)-H(13B)...O(2)#1 | 0.99   | 2.64     | 3.537(3) | 150.4  |
| C(14)-H(14B)...O(2)#2 | 0.99   | 2.64     | 3.531(3) | 149.1  |

---

Symmetry transformations used to generate equivalent atoms:

#1  $x, -y+1, z+1/2$  #2  $x, -y, z+1/2$
